# Supplementary material for: Psychological Distress of Metastatic Melanoma Patients during Treatment with Immune Checkpoint Inhibitors: Results of a Prospective Study
Source: MDPI journal article supplement (doi:10.3390/cancers13112642), 2021-05-27
Supplement: s1 [file s1]

Code:

University Hospital Tuebingen

**University- Dermatology clinic**

Medical Director: Prof. Dr. M. Röcken

Dr. A. Forschner

Tuebingen 07071/  
29-83751 Operator  
29-83768 Secretariat  
29-84599 Melanoma consultation  
29-4599 Fax

andrea.forschner@med.uni-tuebingen.de

## **Second follow-up questionnaire**

*Dear Patient,*

*thank you again for agreeing to participate in our study. A few weeks have now passed since the start of therapy and you will receive the first follow-up questionnaire as discussed.*

*We kindly ask you to answer the following questions completely and then to fill out the enclosed distress thermometer, which you are already familiar with.*

.

*Date (please fill in):* \_\_\_\_\_

1. Since the beginning of the current system therapy, have you had any personal contact with:
  - ☐ a member of the psycho-oncology service here at the hospital?
  - ☐ a psychooncologist/psychotherapist in private practice?
  - ☐ other advice/support: \_\_\_\_\_
2. Was the current system therapy able to be carried out as planned in your case in the last 6 weeks?
  - ☐ yes
  - ☐ no\*

**\*Why not?**

- ☐ Side effects
- ☐ Lack of response of therapy
- ☐ Others: \_\_\_\_\_

3. Have you experienced any side effects related to the therapy in the last 6 weeks?

- ☐ yes\*\*
- ☐ no

\*\* If "Yes": how much do these side effects currently affect you (in the last week including today)?

- ☐ rather few
- ☐ medium
- ☐ rather strong

4. If you have not had any contact with a member of the psycho-oncology service/psychologist/psychotherapist: Looking back, would you say that an appointment or conversation would have helped you?

- ☐ yes
- ☐ no

We thank you very much for answering the questions and wish you a successful course of therapy and all the best!  
(Please return the documents to us in the enclosed envelope).

Lisa Wiens  
PhD student

Dr. A. Forschner,  
Dermatologist, Psychooncologist  
Head of the melanoma outpatient clinic

Dr. Norbert Schäffeler  
Psychologist
